# Supplementary material for: Behind the Scenes of Online Therapeutic Feedback in Blended Therapy for Depression: Mixed-Methods Observational Study
Source: PubMed Central journal article supplement (PMC5958280; doi:10.2196/jmir.9890), 2018-05-03
Supplement: jmir_v20i5e174_app1.pdf [file jmir_v20i5e174_app1.pdf]

**Multimedia Appendix 1. Main<sup>a</sup> and subcategories therapist behaviours, definitions, examples and percentages out of 219 feedback messages.**

| Category therapist behaviors      | Definition                                                                                                      | Example                                                                                               | %           |
|-----------------------------------|-----------------------------------------------------------------------------------------------------------------|-------------------------------------------------------------------------------------------------------|-------------|
| <b>Emphasizing responsibility</b> | Emphasize the responsibility of the pt <sup>b</sup>                                                             | <i>It is useful for yourself to get insight in this by filling in the diary</i>                       | <b>0.1</b>  |
| <b>Affirming</b>                  | Give attention/recognize/show interest in thoughts, emotions and behaviors of the pt and to consider them valid |                                                                                                       | <b>22.2</b> |
| Validating and interpreting       | Confirm by interpreting and validating what the pt has written                                                  | <i>That must be very difficult for you I see that you are struggling with it</i>                      | 10.9        |
| Normalizing                       | Confirm by stating that the behavior of the pt often occurs/is normal                                           | <i>It is not easy to .... /It is very common that you feel this way</i>                               | 1.4         |
| Summarizing online                | Confirm by summarizing and repeating what the pt has written                                                    | <i>You write that you..../You are able to focus and enjoy your activities</i>                         | 7.4         |
| Summarizing f2f                   | Confirm by summarizing and repeating what the pt has said                                                       | <i>This morning we discussed that you....</i>                                                         | 2.5         |
| <b>Clarifying the framework</b>   | Clarify/emphasize/remind the pt of the protocol/framework and give practical information                        | <i>You gave now finished the first part of the treatment, in the second part we will focus on....</i> | <b>3.9</b>  |
| <b>Self-disclosure</b>            | Use experiences and personal examples from the therapist's life                                                 | <i>This exercise has helped me with my sleeping problems</i>                                          | <b>0</b>    |
| <b>Informing</b>                  | Inform or refer to different functionalities on the online platform                                             |                                                                                                       | <b>27.5</b> |
| Informing about the next session  | Inform or refer to the next session and/or its content                                                          | <i>You can now proceed with session 5: Structure and planning</i>                                     | 10.4        |
| Informing about the diary         | Inform or refer to the diary and/or its content                                                                 | <i>It is helpful to set a reminder in your phone to fill in the dairy everyday</i>                    | 2.8         |
| Informing about the monitoring    | Inform or refer to the monitoring/questionnaire and/or its content                                              | <i>Your score on the QIDS is 7, so your symptoms are mild now</i>                                     | 1.5         |
| Informing about the assignments   | Inform or refer to the assignments in the previous session and/or its content                                   | <i>You kept track of your activities during the weekend, I'm curious about your week-days</i>         | 3.7         |
| Informing about the f2f           | Inform or refer to face-to-face                                                                                 | <i>See you next week, at 14.00!</i>                                                                   | 9.1         |

| session                     | session                                                                               |                                                                                                          |             |
|-----------------------------|---------------------------------------------------------------------------------------|----------------------------------------------------------------------------------------------------------|-------------|
| <b>Confronting</b>          | Express a different opinion or disagree with the pt                                   | <i>I do not think that your activities are useless, but I think the opposite!</i>                        | <b>0.4</b>  |
| <b>Urging</b>               | Urge to let the pt do something                                                       | <i>It is important that you try this</i>                                                                 | <b>3.9</b>  |
| <b>Encouraging</b>          | Encourage/motivate past and future behavior of the pt                                 |                                                                                                          | <b>23.4</b> |
| Praising past behavior      | Praise something the pt has done in the past                                          | <i>Even though you found it difficult, you did it, very good!</i>                                        | 14.5        |
| Inciting future behavior    | Incite something that the pt is planning to do                                        | <i>Continue to keep up this good work! Good luck!</i>                                                    | 8.9         |
| <b>Guiding</b>              | Give advice, information or suggestions                                               |                                                                                                          | <b>11.3</b> |
| Psychoeducation             | Give information on psychological processes                                           | <i>The fact that it doesn't immediately give more pleasure is something we see often in a depression</i> | 5.5         |
| Giving suggestions          | Give suggestions about alternative behavior/provide advice on how it can be addressed | <i>Try to think of something that's easy to do and cannot easily go wrong</i>                            | 5.8         |
| <b>Questions</b>            | Ask or answer questions                                                               |                                                                                                          | <b>6.9</b>  |
| Asking questions to clarify | Ask questions to better understand the behavior or emotions of the pt                 | <i>Is that something you already do?/ ... is that correct?</i>                                           | 3.4         |
| Asking 'thought' questions  | Ask questions to encourage the pt to think further                                    | <i>How would you like to feel and what should your life look like?</i>                                   | 3.2         |
| Answering questions         | Respond to questions of the pt                                                        | <i>Yes, I will repeat this session for you, so that you can practice more</i>                            | 0.3         |

<sup>a</sup>Main categories are in bold.

<sup>b</sup>Pt stands for patient.
