# Supplementary material for: Behind the Scenes of Online Therapeutic Feedback in Blended Therapy for Depression: Mixed-Methods Observational Study
Source: PubMed Central journal article supplement (PMC5958280; doi:10.2196/jmir.9890), 2018-05-03
Supplement: jmir_v20i5e174_app2.pdf [file jmir_v20i5e174_app2.pdf]

**Multimedia Appendix 2. Main<sup>a</sup> and subcategories feedback instructions, descriptions, examples and percentages out of 219 feedback messages.**

| Category                     | Description in instructions                                                                                                                                  | Example                                                                                                                                                             | Yes %       |
|------------------------------|--------------------------------------------------------------------------------------------------------------------------------------------------------------|---------------------------------------------------------------------------------------------------------------------------------------------------------------------|-------------|
| <b>feedback instructions</b> |                                                                                                                                                              |                                                                                                                                                                     |             |
| <b>Greeting/ending</b>       |                                                                                                                                                              |                                                                                                                                                                     | <b>95.9</b> |
| Correct greeting             | Use a greeting                                                                                                                                               | <i>Dear [name pt<sup>b</sup>]</i>                                                                                                                                   | 95.4        |
| Correct ending               | Use a correct ending                                                                                                                                         | <i>Good luck with the next session!</i>                                                                                                                             | 96.3        |
|                              |                                                                                                                                                              | <i>Greetings, [name therapist]</i>                                                                                                                                  |             |
| <b>Communication skills</b>  |                                                                                                                                                              |                                                                                                                                                                     | <b>69.4</b> |
| Begin with compliment        | Begin the message with a                                                                                                                                     | <i>From your answers I can see it was</i>                                                                                                                           | 79.0        |
|                              | compliment/positive approach                                                                                                                                 | <i>difficult, but you did very good!</i>                                                                                                                            |             |
| Summarize                    | Summarize the assignments of the pt,<br>use his/her own words                                                                                                | <i>You clearly described your depression,<br/>the loss of interest/energy, negative<br/>thoughts and worrying.</i>                                                  | 73.1        |
| Reading homework             | Show that you have read the homework<br>by using their examples                                                                                              | <i>I see that you.../You say that you.../If I<br/>understand you correctly...</i>                                                                                   | 88.6        |
| Hypotheses                   | Formulate sentences as hypotheses                                                                                                                            | <i>That sounds like..... , is that correct?.. If I<br/>understand you correctly.....</i>                                                                            | 10.5        |
| Giving no solutions          | Give no solutions, let patients think of<br>their own solutions. You can give them a<br>starter in the right direction                                       | <i>When was the last time you felt that<br/>way? What did you think and what did<br/>you do differently then?</i>                                                   | 95.6        |
| <b>Structure</b>             |                                                                                                                                                              |                                                                                                                                                                     | <b>87.7</b> |
| 2 subjects                   | Give feedback on max two subjects in<br>order to keep the structure clear                                                                                    |                                                                                                                                                                     | 95.4        |
| Within 3 working days        | Give feedback within three working<br>days. Make an agreement when the pt<br>should finish the session and when you<br>as a therapist can write the feedback |                                                                                                                                                                     | 79.9        |
| <b>Referring</b>             |                                                                                                                                                              |                                                                                                                                                                     | <b>34.0</b> |
| Referring diary              | Reflect on the diary or when the pt did<br>not succeed yet, address (again) the<br>utility of the diary                                                      | <i>Good that you used the diary. I can see<br/>that your mood is different in the<br/>mornings than in the evenings, it that<br/>something you also experience?</i> | 26.9        |
| Referring monitoring         | Refer to the monitoring questionnaire or<br>when the pt did not succeed yet, ask to<br>fill this in next time                                                | <i>Your score on the QIDS is 7, so right now<br/>your symptoms are mild.</i>                                                                                        | 11.4        |
| Referring next session       | End the message with a reference to the<br>content of the next session                                                                                       | <i>I will open the next session for you. There<br/>you can further practice with the<br/>schemas</i>                                                                | 41.6        |
| Referring next f2f session   | Confirm the next f2f appointment                                                                                                                             | <i>We will see each other again on May 19.</i>                                                                                                                      | 56.2        |
| <b>Readability</b>           |                                                                                                                                                              |                                                                                                                                                                     | <b>68.0</b> |
| Short sentences              | Write short, clear sentences.                                                                                                                                |                                                                                                                                                                     | 61.6        |
| Short paragraphs             | Write short, clear paragraphs                                                                                                                                |                                                                                                                                                                     | 74.4        |
| <b>Writing style</b>         |                                                                                                                                                              |                                                                                                                                                                     | <b>93.6</b> |
| Limit abbreviations          | Limit your abbreviations                                                                                                                                     |                                                                                                                                                                     | 97.3        |

|                    |                                                                                                                             |                                               |      |
|--------------------|-----------------------------------------------------------------------------------------------------------------------------|-----------------------------------------------|------|
| Limit misspellings | Be aware of misspellings                                                                                                    |                                               | 78.5 |
| Limit emphasis     | Limit text in caps, exclamation marks,<br>underline text or make text bold                                                  |                                               | 98.6 |
| Correct emoticons  | Use emoticons only when you know the<br>meaning is clear for the pt and use it as<br>a complement and not as a substitution | <i>And do not forget the fun activities</i> ☐ | 100  |

---

<sup>a</sup>Main categories are in bold.

<sup>b</sup>Pt stands for patient.
